# Supplementary material
Source: Springer Nature journal article supplement (https://www.springermedizin.de/resource/supplementary/12936_2009_1014_MOESM7_ESM.pdf/9548798)
Supplement: MOESM7 [file 9548798]

# FORMATIONS SANITAIRES DU DISTRICT DE NOUNA

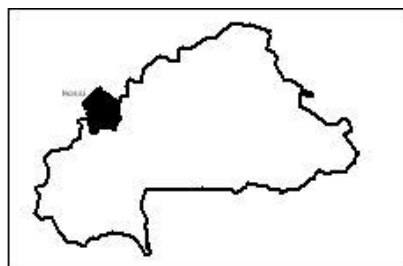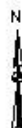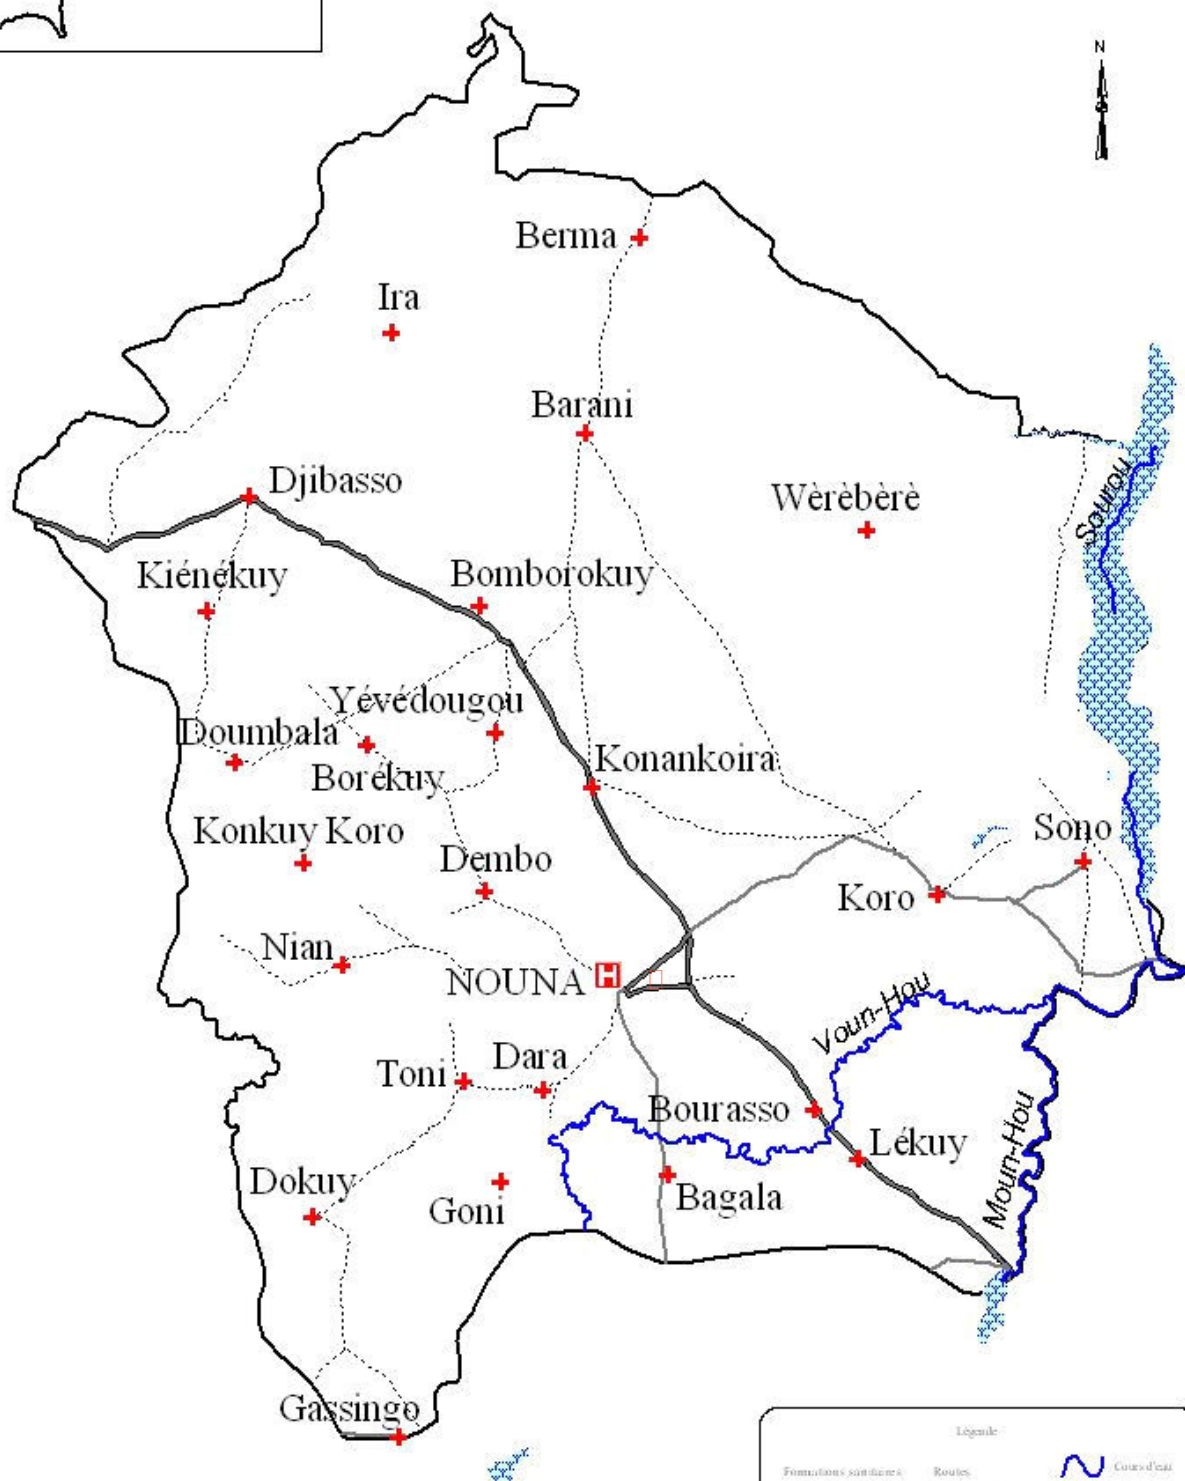

Données géographiques :  
Carte de l'Afrique de l'Ouest au 1:200 000  
Données sanitaires :  
District Sanitaire de Nouna  
Auteur : S. Simbarof/SIG & TD/CRSN

10 0 10 Kilom eters

| Légende               |            |             |
|-----------------------|------------|-------------|
| Formations sanitaires | Routes     | Cours d'eau |
| CSPS                  | tertiaire  | Marécages   |
| CMA                   | secondaire | District    |
|                       | primaire   |             |
